# Supplementary material
Source: Elsevier journal article supplement (https://www.sciencedirect.com/science/article/pii/S2530064421000675)
Supplement: mmc1 [file S2530064421000675:mmc1.xlsx]

## Sheet: Hoja1
Appendix S1. List of the 49 hummingbirds species considered in this study that inhabit across Mexico. We provided information about the GBIF’s doi, number of occurrences, bioclimatic variables set and parameter settings (feature classes and regularization multiplier values) used for modelling, as well as the performance values (partial ROC, Akaike Information Criterion, and omission rate) of mode…
						Species Occurrence records and model parameters
Species	Geographcial range category	Habitat specificity	IUCN category	NOM category	GBIF’s access numbers (Doi)	Environmental variables used for models	Buffer distance applied to points (kms)	Number of unique presence records into 5km2	Feature	Regularizator multiple	ROC-Partial values	AICc	% Omission testing data	Number of data omitted	Threshold value
Abeillia abeillei (Lesson & Delattre, 1839)	Intermediate	Specialist	LC	Pr	GBIF.org (14 December 2020) GBIF Occurrence Download https://doi.org/10.15468/dl.u8w9q9	PC1, PC2, PC3, PC4	3	107	t	2.5	1.31	1535.93	0.05	1	0.3423
Amazilia rutila Bonaparte, 1849	Large	Specialist	LC	sc	GBIF.org (30 October 2020) GBIF Occurrence Download https://doi.org/10.15468/dl.xk7rtc	Bio 1, Bio 2, Bio 3, Bio 4, Bio 13, Bio 14, Bio 15	4	2418	lth	1.8	1.48	38270.5	0.0484	23	0.418622
Amazilia tzacatl (De la Llave, 1833)	Large	Generalist	LC	sc	GBIF.org (06 November 2020) GBIF Occurrence Download https://doi.org/10.15468/dl.st6zy7	Bio 1, Bio 2, Bio 4, Bio 13, Bio 14, Bio 15	5	2180	pth	1.8	1.16673	48786	0.0478821	21	0.38293
Amazilia yucatanensis (Cabot, 1845)	Large	Generalist	LC	sc	GBIF.org (06 November 2020) GBIF Occurrence Download https://doi.org/10.15468/dl.48egu5	Bio 2, Bio 3, Bio 10, Bio 13, Bio 14, Bio 15	4	1345	lpt	1.4	1.62	21261.1	0.0436508	12	0.387581
Anthracothorax prevostii (Lesson, 1832)	Intermediate	Generalist	LC	sc	GBIF.org (07 November 2020) GBIF Occurrence Download https://doi.org/10.15468/dl.gxxn9v	Bio 1, Bio 2, Bio 3, Bio 13, Bio 14, Bio 15	3	1458	t	1.4	1.38659	23800.7	0.0474453	14	0.369071
Basilinna leucotis (Vieillot, 1818)	Large	Generalist	LC	sc	GBIF.org (29 October 2020) GBIF Occurrence Download https://doi.org/10.15468/dl.ses5rx	Bio 1, Bio 2, Bio 3, Bio 4, Bio 13, Bio 14, Bio 15	2	557	lpt	1.2	1.54597	8355.05	0.0384615	4	0.292634
Basilinna xantusii (Lawrence, 1860)	Small	Specialist	LC	sc	GBIF.org (29 October 2020) GBIF Occurrence Download https://doi.org/10.15468/dl.zgwev9	PC1, PC2, PC3, PC4	1	36	lq	0.8	1.87106	371.779	0	0	0.218116
Calothorax pulcher Gould, 1859	Intermediate	Specialist	LC	sc	GBIF.org (08 November 2020) GBIF Occurrence Download https://doi.org/10.15468/dl.kndz8m	Bio 2, Bio 3, Bio 4, Bio 6, Bio 13, Bio 14	2	34	lq	3.5	1.68165	470.293	0.334987	2	0.431859
Campylopterus hemileucurus (Deppe, 1830)	Intermediate	Generalist	LC	sc	GBIF.org (08 November 2020) GBIF Occurrence Download https://doi.org/10.15468/dl.y6cksq	Bio 1, Bio 2, Bio 3, Bio 13, Bio 14, Bio 15	3	794	pth	1.8	1.42888	11697.7	0.033557	5	0.279956
Chlorestes candida (Bourcier & Mulsant, 1846)	Intermediate	Specialist	LC	sc	GBIF.org (14 December 2020) GBIF Occurrence Download https://doi.org/10.15468/dl.tjyjux	Bio 3, Bio 4, Bio 7, Bio 10, Bio 13, Bio 14, Bio 15	2	925	lth	3	1.36	13718.9	0.052	10	0.3488
Chlorestes eliciae (Bourcier & Mulsant, 1846)	Small	Specialist	LC	sc	GBIF.org (14 November 2020) GBIF Occurrence Download https://doi.org/10.15468/dl.9dyh4y	Bio 1, Bio 2, Bio 3, Bio 4, Bio 13, Bio 14, Bio 15	2	471	lqt	2.5	1.4	6936.88	0.045	4	0.232982
Colibri thalassinus (Swainson, 1827)	Large	Specialist	LC	sc	GBIF.org (08 November 2020) GBIF Occurrence Download https://doi.org/10.15468/dl.3rkkkb	PC1, PC2, PC3, PC4	3	571	lth	6	1.38591	8856.8	0.046729	5	0.283853
Cynanthus auriceps (Gould, 1852)	Intermediate	Specialist	LC	sc	GBIF.org (14 December 2020) GBIF Occurrence Download https://doi.org/10.15468/dl.ahtkn4	Bio 2, Bio 3, Bio 4, Bio 5, Bio 12, Bio 14, Bio 15	4	213	lpt	1.8	1.62	2856.09	0.025	1	0.313
Cynanthus canivetii (Lesson, 1832)	Large	Specialist	LC	sc	GBIF.org (14 December 2020) GBIF Occurrence Download https://doi.org/10.15468/dl.763zak	Bio 1, Bio 2, Bio 3, Bio 13, Bio 14, Bio 15	2	1633	qp	0.4	1.19	25743.5	0.0359	12	0.4211
Cynanthus forficatus Ridgway, 1885	Small	Specialist	LC	sc	GBIF.org (14 December 2020) GBIF Occurrence Download https://doi.org/10.15468/dl.m8p47d	Bio 1, Bio 7, Bio 14, Bio 16, Bio 17	1	9	l	1	-	-	0.1	1
Cynanthus latirostris Swainson, 1827	Large	Generalist	LC	sc	GBIF.org (14 December 2020) GBIF Occurrence Download https://doi.org/10.15468/dl.xnnpth	Bio 1, Bio 2, Bio 3, Bio 12, Bio 14, Bio 15	4	1873	pth	2.5	1.176	31272	0.047	18	0.3713
Doricha eliza (Lesson & Delattre, 1839)	Small	Specialist	NT	Pr	GBIF.org (29 October 2020) GBIF Occurrence Download https://doi.org/10.15468/dl.axuxmz	Bio 2, Bio 3, Bio 4, Bio 5, Bio 12, Bio 15	1	53	lqt	1.8	1.94065	573.829	0	0	0.192127
Doricha enicura (Vieillot, 1818)	Intermediate	Specialist	LC	A	GBIF.org (09 November 2020) GBIF Occurrence Download https://doi.org/10.15468/dl.whyjsb	Bio 2, Bio 3, Bio 6, Bio 14, Bio 15, Bio 16	2	31	lq	0.6	1.7	400.715	0	0	0.209657
Eugenes fulgens (Swainson, 1827)	Large	Specialist	LC	sc	GBIF.org (12 November 2020) GBIF Occurrence Download https://doi.org/10.15468/dl.qjsmtk	Bio 1, Bio 2, Bio 3, Bio 13, Bio 14, Bio 15	4	1087	pt	2.5	1.4	17766.5	0.0490196	11	0.285155
Eupherusa cyanophrys J.S.Rowley & Orr, 1964	Small	Generalist	EN	Pr	GBIF.org (12 November 2020) GBIF Occurrence Download https://doi.org/10.15468/dl.2mjazp	Bio 2, Bio 4, Bio 6, Bio 14, Bio 15, Bio 16	1	29	lth	3.5	1.85269	312.924	0	0	0.455698
Eupherusa eximia (Delattre, 1843)	Intermediate	Generalist	LC	sc	GBIF.org (12 November 2020) GBIF Occurrence Download https://doi.org/10.15468/dl.ptfjjk	Bio 2, Bio 3, Bio 6, Bio 13, Bio 14, Bio 15	2	339	p	0.4	1.23489	4962.18	0.046875	3	0.289776
Eupherusa poliocerca Elliot, 1871	Intermediate	Generalist	VU	A	GBIF.org (12 November 2020) GBIF Occurrence Download https://doi.org/10.15468/dl.sjx7up	PC1, PC2, PC3, PC4	2	27	t	2	1.61577	332.962	0	0	0.542864
Eupherusa ridgwayi Nelson, 1900	Intermediate	Specialist	VU	A	GBIF.org (14 December 2020) GBIF Occurrence Download https://doi.org/10.15468/dl.4s5x5r	Bio 3, Bio 4, Bio 7, Bio 10, Bio 12, Bio 17	2	15	lp	0.8	1.935	178.849	0	0	0.28104
Florisuga mellivora (Linnaeus, 1758)	Intermediate	Specialist	LC	sc	GBIF.org (14 December 2020) GBIF Occurrence Download https://doi.org/10.15468/dl.6xqyps	Bio 1, Bio 2, Bio 3, Bio 4, Bio 13, Bio 14, Bio 15	6	2052	lpt	0.8	1.32	37115.3	0.0415	17	0.2881
Heliomaster constantii (Delattre, 1843)	Large	Generalist	LC	sc	GBIF.org (12 November 2020) GBIF Occurrence Download https://doi.org/10.15468/dl.bhhss2	Bio 2, Bio 3, Bio 4, Bio 5, Bio 14, Bio 15, Bio 16	4	777	t	4	1.46	12281.6	0.0479	7	0.383757
Heliomaster longirostris (Audebert & Vieillot, 1801)	Intermediate	Specialist	LC	Pr	GBIF.org (14 November 2020) GBIF Occurrence Download https://doi.org/10.15468/dl.77x7vs	Bio 1, Bio 2, Bio 3, Bio 4, Bio 13, Bio 14, Bio 15	6	1497	lqp	0.4	1.2945	27721.3	0.0427	13	0.24561
Heliothryx barroti (Bourcier, 1843)	Small	Specialist	LC	A	GBIF.org (14 December 2020) GBIF Occurrence Download https://doi.org/10.15468/dl.4gssnt	Bio 2, Bio 3, Bio 11, Bio 13, Bio 14, Bio 15	2	724	pt	1.6	1.475	10762.5	0.0441	6	0.328
Lampornis amethystinus Swainson, 1827	Large	Specialist	LC	sc	GBIF.org (14 November 2020) GBIF Occurrence Download https://doi.org/10.15468/dl.3da3zc	PC1, PC2, PC3, PC4	5	324	p	0.6	1.34	5291.25	0.049	3	0.270061
Lampornis clemenciae (Lesson, 1829)	Large	Generalist	LC	sc	GBIF.org (14 November 2020) GBIF Occurrence Download https://doi.org/10.15468/dl.axf8cw	Bio 1, Bio 2, Bio 3, Bio 12, Bio 14, Bio 15	3	610	lqp	0.6	1.26652	9659.66	0.0438596	5	0.157851
Lampornis viridipallens (Bourcier & Mulsant, 1846)	Small	Specialist	LC	Pr	GBIF.org (14 November 2020) GBIF Occurrence Download https://doi.org/10.15468/dl.metyxk	Bio 2, Bio 3, Bio 6, Bio 14, Bio 15, Bio 16	1	129	lqp	1.6	1.63686	1584.48	0.0416667	1	0.2131
Lamprolaima rhami (Lesson, 1839)	Intermediate	Specialist	LC	Pr	GBIF.org (14 November 2020) GBIF Occurrence Download https://doi.org/10.15468/dl.byzbu5	Bio 1, Bio 2, Bio 4, Bio 6, Bio 13, Bio 14, Bio 15	2	130	lqt	4.5	1.589	1737.22	0.0416667	1	0.2028
Leucolia violiceps (Gould, 1859)	Large	Generalist	LC	sc	GBIF.org (14 December 2020) GBIF Occurrence Download https://doi.org/10.15468/dl.assujw	Bio 1, Bio 2, Bio 3, Bio 12, Bio 14, Bio 15	3	1087	t	1	1.508	17237.2	0.0441	10	0.3098
Leucolia viridifrons (Elliot, 1871)	Intermediate	Generalist	LC	A	GBIF.org (14 December 2020) GBIF Occurrence Download https://doi.org/10.15468/dl.ywhqdt	Bio 1, Bio 2, Bio 3, Bio 4, Bio 14, Bio 15, Bio 16	2	119	lqp	1	1.3639	1721.09	0.0454	1	0.4628
Lophornis brachylophus R.T.Moore, 1949	Small	Specialist	CR	P	GBIF.org (29 October 2020) GBIF Occurrence Download https://doi.org/10.15468/dl.dst5fk	PC1, PC2, PC3, PC4	1	9	l	1	-	-	0.1	1
Lophornis helenae (Delattre, 1843)	Intermediate	Specialist	LC	A	GBIF.org (14 November 2020) GBIF Occurrence Download https://doi.org/10.15468/dl.3ug9gq	Bio 1, Bio 2, Bio 4, Bio 11, Bio 12, Bio 14, Bio 16	4	115	pth	4.5	1.36	1599.62	0.045	1	0.25148
Pampa curvipennis (Deppe, 1830)	Intermediate	Specialist	LC	sc	GBIF.org (14 December 2020) GBIF Occurrence Download https://doi.org/10.15468/dl.sdhvnm	Bio 2, Bio 4, Bio 5, Bio 12, Bio 14, Bio 15	4	577	t	1.6	1.4884	8358.21	0.03703	4	0.3729
Pampa excellens (Wetmore, 1941)	Intermediate	Specialist	LC	Pr	GBIF.org (14 December 2020) GBIF Occurrence Download https://doi.org/10.15468/dl.r8fhke	Bio 3, Bio 7, Bio 11, Bio 15, Bio 16	2	22	lqp	1	1.7977	257.12	0	0	0.3446
Pampa rufa Lesson, 1840	Small	Specialist	LC	Pr	GBIF.org (14 December 2020) GBIF Occurrence Download https://doi.org/10.15468/dl.p7jjta	Bio 2, Bio 3, Bio 5, Bio 14, Bio 15, Bio 16	1	92	lth	3	1.85	1003.91	0.058	1	0.3398
Phaeochroa cuvierii (Delattre & Bourcier, 1846)	Small	Specialist	LC	sc	GBIF.org (17 November 2020) GBIF Occurrence Download https://doi.org/10.15468/dl.dzascr	Bio 1, Bio 2, Bio 3, Bio 10, Bio 13, Bio 14, Bio 15	2	594	p	0.4	1.27551	8970.91	0.044642	5	0.310985
Phaeoptila sordida (Gould, 1859)	Intermediate	Specialist	LC	sc	GBIF.org (14 December 2020) GBIF Occurrence Download https://doi.org/10.15468/dl.g8bav6	Bio 2, Bio 3, Bio 6, Bio 13, Bio 14, Bio 15	2	157	lq	0.4	1.6035	2030.6	0.033	1	0.2663
Phaethornis longirostris (Delattre, 1843)	Intermediate	Generalist	LC	sc	GBIF.org (17 November 2020) GBIF Occurrence Download https://doi.org/10.15468/dl.euzr8v	PC1, PC2, PC3, PC4	4	1229	lpt	1.4	1.31073	19899.6	0.0478261	12	0.33913
Phaethornis mexicanus Hartert, 1897	Intermediate	Specialist	LC	sc	GBIF.org (29 October 2020) GBIF Occurrence Download https://doi.org/10.15468/dl.kzvfeb	Bio 2, Bio 3, Bio 5, Bio 12, Bio 15, Bio 17	2	67	pth	6	1.59768	926.952	0	0	0.302395
Phaethornis striigularis Gould, 1854	Intermediate	Specialist	LC	Pr	GBIF.org (17 November 2020) GBIF Occurrence Download https://doi.org/10.15468/dl.8m3sek	PC1, PC2, PC3, PC4	4	1458	t	6	1.155	24434.5	0.0474	14	0.467922
Saucerottia beryllina (Deppe, 1830)	Large	Generalist	LC	sc	GBIF.org (14 December 2020) GBIF Occurrence Download https://doi.org/10.15468/dl.2s9uua	Bio 2, Bio 3, Bio 4, Bio 5, Bio 14, Bio 15, Bio 16	3	1167	pt	1.6	1.5348	18233.5	0.0456	11	0.371
Saucerottia cyanocephala (Lesson, 1829)	Intermediate	Specialist	LC	sc	GBIF.org (14 December 2020) GBIF Occurrence Download https://doi.org/10.15468/dl.m6zq4c	Bio 1, Bio 2, Bio 3, Bio 4, Bio 13, Bio 14, Bio 15	3	689	lth	2.5	1.456	10269.6	0.0465	6	0.35016
Saucerottia cyanura Gould, 1859	Small	Generalist	LC	sc	GBIF.org (14 December 2020) GBIF Occurrence Download https://doi.org/10.15468/dl.fhwj4t	Bio 4, Bio 6, Bio 7, Bio 14, Bio 15, Bio 16	1	94	lpt	2	1.357	1149.37	0.166	3	0.2346
Selasphorus ellioti Ridgway, 1878	Small	Specialist	LC	A	GBIF.org (14 December 2020) GBIF Occurrence Download https://doi.org/10.15468/dl.737vkp	Bio 2, Bio 3, Bio 4, Bio 5, Bio 14, Bio 15, Bio 16, Bio 17	2	45	lt	1.4	1.828	577.54	0	0	0.2533
Selasphorus heloisa (Lesson & Delattre, 1839)	Intermediate	Specialist	LC	sc	GBIF.org (14 December 2020) GBIF Occurrence Download https://doi.org/10.15468/dl.kxvqq8	PC1, PC2, PC3, PC4	2	196	lqp	0.8	1.46	2835.01	0.027	1	0.1831
Tilmatura dupontii (Lesson, 1832)	Intermediate	Specialist	LC	A	GBIF.org (17 November 2020) GBIF Occurrence Download https://doi.org/10.15468/dl.cc2b3h	Bio 1, Bio 2, Bio 3, Bio 4, Bio 13, Bio 14, Bio 15	3	303	p	0.6	1.57042	4592.39	0.0350877	2	0.325468
